# Supplementary material
Source: HighWire-hosted journal article supplement (https://www.cmajopen.ca/highwire/filestream/80878/field_highwire_adjunct_files/1/open-2015-0092-cheers-checklist.pdf)

**The CHEERS Checklist is part of the CHEERS Statement. The CHEERS Statement has been endorsed and co-published by the following journals:**

BJOG: An International Journal of Obstetrics and Gynaecology

[BMC Medicine 2013; 11:80](#)

[BMJ 2013;346:f1049](#)

[Clinical Therapeutics 27 March 2013 \(Article in Press DOI: 10.1016/j.clinthera.2013.03.003\)](#)

[Cost Effectiveness and Resource Allocation 2013 11:6.](#)

[The European Journal of Health Economics 2013 Mar 26. \[Epub ahead of print\]](#)

International Journal of Technology Assessment in Health Care

[Journal of Medical Economics 2013 Mar 25. \[Epub ahead of print\]](#)

[Pharmacoeconomics 2013 Mar 26. \[Epub ahead of print\]](#)

[Value in Health 2013 March - April;16\(2\):e1-e5](#)

## CHEERS Checklist

### Items to include when reporting economic evaluations of health interventions

| Section/item                    | Item No | Recommendation                                                                                                                                                                          | Reported on page No/line No                 |
|---------------------------------|---------|-----------------------------------------------------------------------------------------------------------------------------------------------------------------------------------------|---------------------------------------------|
| <b>Title and abstract</b>       |         |                                                                                                                                                                                         |                                             |
| Title                           | 1       | Identify the study as an economic evaluation or use more specific terms such as “cost-effectiveness analysis”, and describe the interventions compared.                                 | <u>Page 1</u>                               |
| Abstract                        | 2       | Provide a structured summary of objectives, perspective, setting, methods (including study design and inputs), results (including base case and uncertainty analyses), and conclusions. | <u>Page 2-3</u>                             |
| <b>Introduction</b>             |         |                                                                                                                                                                                         |                                             |
| Background and objectives       | 3       | Provide an explicit statement of the broader context for the study.<br>Present the study question and its relevance for health policy or practice decisions.                            | <u>P. 4, paragraph 1, P. 5, Paragraph 1</u> |
| <b>Methods</b>                  |         |                                                                                                                                                                                         |                                             |
| Target population and subgroups | 4       | Describe characteristics of the base case population and subgroups analysed, including why they were chosen.                                                                            | <u>P. 4, Paragraph 2</u>                    |
| Setting and location            | 5       | State relevant aspects of the system(s) in which the decision(s) need(s) to be made.                                                                                                    | <u>P. 4, Paragraph 2</u>                    |
| Study perspective               | 6       | Describe the perspective of the study and relate this to the costs being evaluated.                                                                                                     | <u>P 5, Paragraph 2</u>                     |
| Comparators                     | 7       | Describe the interventions or strategies being compared and state why they were chosen.                                                                                                 | <u>P. 5, Paragraph 2</u>                    |
| Time horizon                    | 8       | State the time horizon(s) over which costs and consequences are being evaluated and say why appropriate.                                                                                | <u>P. 9, Paragraph 2</u>                    |
| Discount rate                   | 9       | Report the choice of discount rate(s) used for costs and                                                                                                                                | <u>P. 9, Paragraph 2</u>                    |

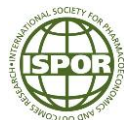



|                                                                      |     |                                                                                                                                                                                                                                                                             |                                      |
|----------------------------------------------------------------------|-----|-----------------------------------------------------------------------------------------------------------------------------------------------------------------------------------------------------------------------------------------------------------------------------|--------------------------------------|
| Incremental costs and outcomes                                       | 19  | For each intervention, report mean values for the main categories of estimated costs and outcomes of interest, as well as mean differences between the comparator groups. If applicable, report incremental cost-effectiveness ratios.                                      | <u>P. 10, paragraph 1</u>            |
| Characterising uncertainty                                           | 20a | <i>Single study-based economic evaluation:</i> Describe the effects of sampling uncertainty for the estimated incremental cost and incremental effectiveness parameters, together with the impact of methodological assumptions (such as discount rate, study perspective). | <u>Not Applicable</u>                |
|                                                                      | 20b | <i>Model-based economic evaluation:</i> Describe the effects on the results of uncertainty for all input parameters, and uncertainty related to the structure of the model and assumptions.                                                                                 | <u>Pp. 10-11, Table 3</u>            |
| Characterising heterogeneity                                         | 21  | If applicable, report differences in costs, outcomes, or cost-effectiveness that can be explained by variations between subgroups of patients with different baseline characteristics or other observed variability in effects that are not reducible by more information.  | <u>Not Applicable</u>                |
| <b>Discussion</b>                                                    |     |                                                                                                                                                                                                                                                                             |                                      |
| Study findings, limitations, generalisability, and current knowledge | 22  | Summarise key study findings and describe how they support the conclusions reached. Discuss limitations and the generalisability of the findings and how the findings fit with current knowledge.                                                                           | <u>P. 11, paragraph 2, Pp. 11-14</u> |
| <b>Other</b>                                                         |     |                                                                                                                                                                                                                                                                             |                                      |
| Source of funding                                                    | 23  | Describe how the study was funded and the role of the funder in the identification, design, conduct, and reporting of the analysis. Describe other non-monetary sources of support.                                                                                         | <u>Page 16</u>                       |
| Conflicts of interest                                                | 24  | Describe any potential for conflict of interest of study contributors in accordance with journal policy. In the absence of a journal policy, we recommend authors comply with International Committee of Medical Journal Editors recommendations.                           | <u>Page 16</u>                       |

For consistency, the CHEERS Statement checklist format is based on the format of the CONSORT statement checklist

The CHEERS Statement may be accessed by the publication links above.

The **ISPOR CHEERS Task Force Report** provides examples and further discussion of the 24-item CHEERS Checklist and the CHEERS Statement. It may be accessed via the *Value in Health* link or via the ISPOR Health Economic Evaluation Publication Guidelines – CHEERS: Good Reporting Practices webpage: <http://www.ispor.org/TaskForces/EconomicPubGuidelines.asp>

The citation for the CHEERS Task Force Report is:

Husereau D, Drummond M, Petrou S, et al. Consolidated health economic evaluation reporting standards (CHEERS)—Explanation and elaboration: A report of the ISPOR health economic evaluations publication guidelines good reporting practices task force. *Value Health* 2013;16:231-50.



Supplement: open-2015-0092-cheers-checklist.pdf [file open-2015-0092-cheers-checklist.pdf]
